# Supplementary material
Source: PubMed Central journal article supplement (PMC6856253)
Supplement: 13205_2019_1986_MOESM1_ESM.pdf [file 13205_2019_1986_MOESM1_ESM.pdf]

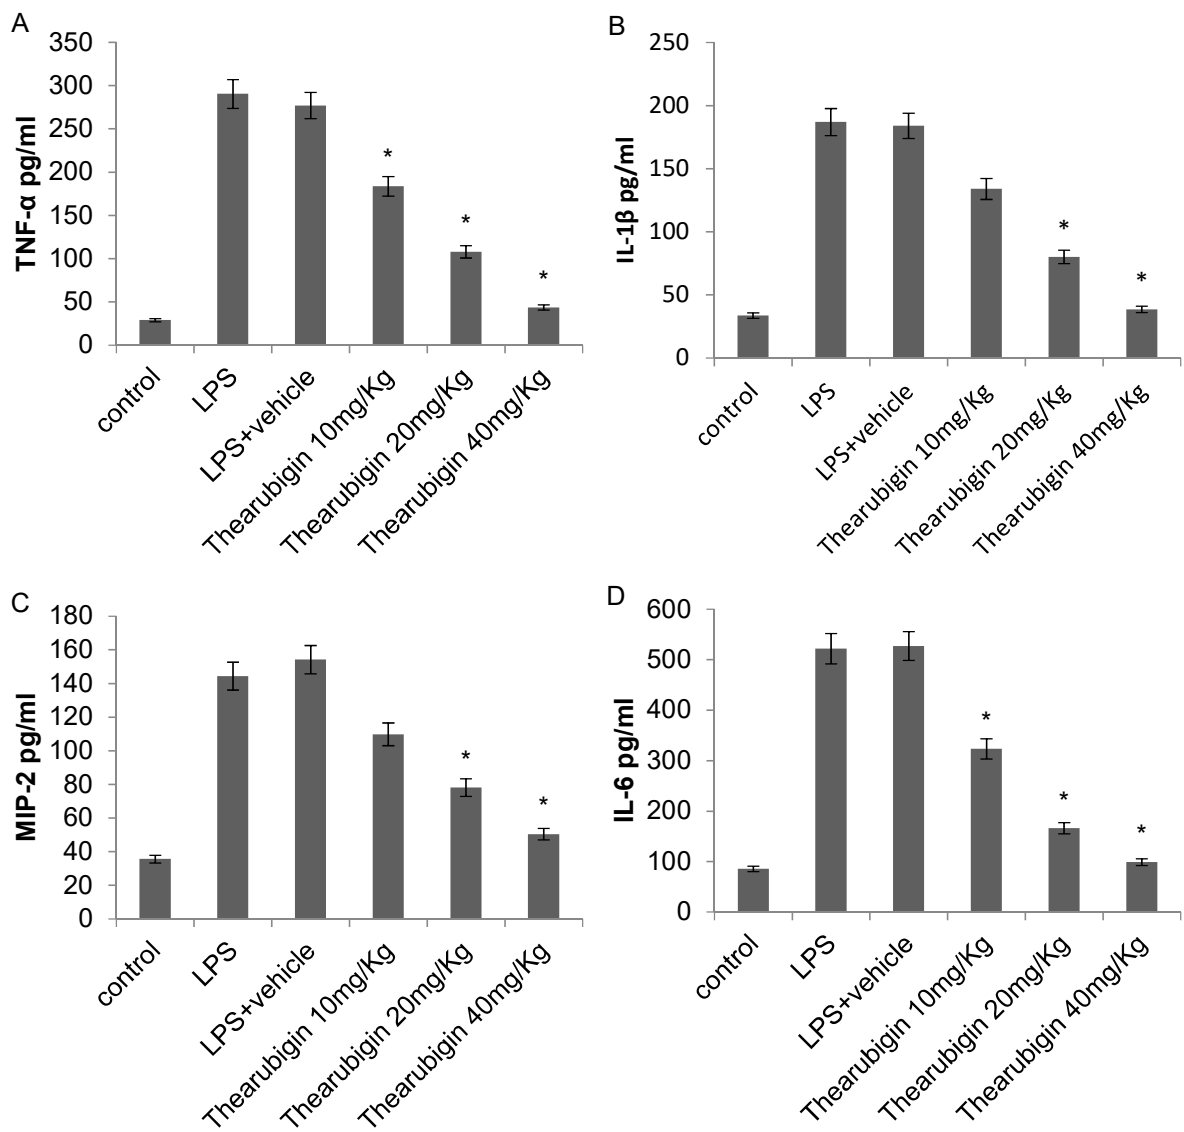

Supplementary figure 1: Effect of thearubigin treatment on LPS-induced pro-inflammatory cytokine secretion in the serum of differentially treated ALI rats. Levels of (A) TNF- $\alpha$ , (B) IL-1 $\beta$ , (C) MIP-2 and (D) IL-6 in the serum. LPS, lipopolysaccharide.

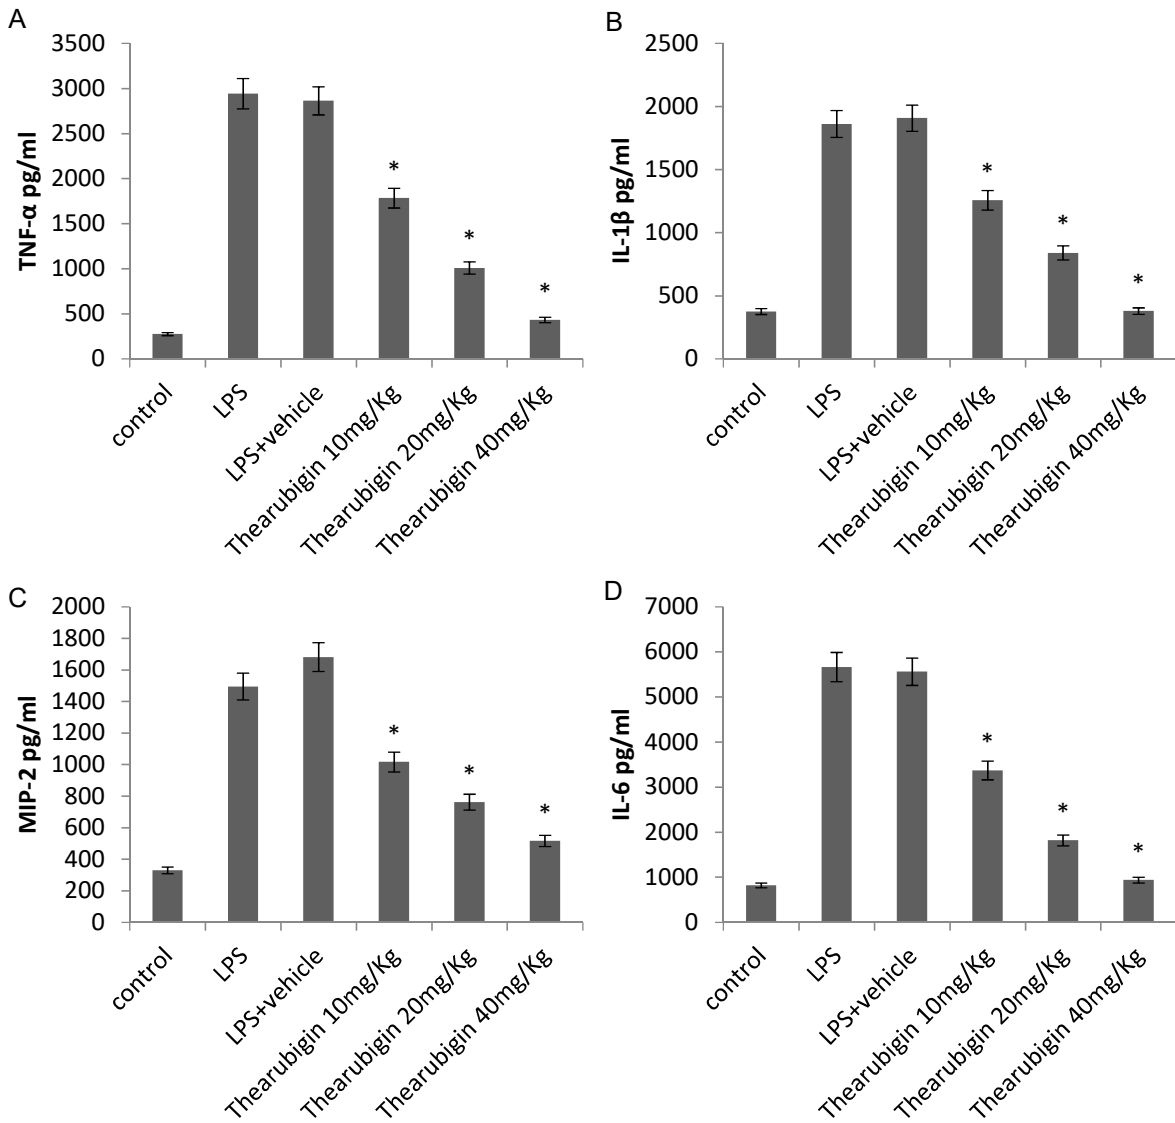

Supplementary figure 2: Effect of thearubigin treatment on LPS-induced pro-inflammatory cytokine secretion in the BALF of differentially treated ALI rats. Levels of (A) TNF- $\alpha$ , (B) IL-1 $\beta$ , (C) MIP-2 and (D) IL-6 in the serum. LPS, lipopolysaccharide.
